# Supplementary material for: Matching between Donors and Ulcerative Colitis Patients Is Important for Long-Term Maintenance after Fecal Microbiota Transplantation
Source: MDPI journal article supplement (doi:10.3390/jcm9061650), 2020-05-31
Supplement: s1 [file s1]

| #4                                            | Read   | Patient before | 2 weeks after | 2 months after | 12 months   | 24 months   |
|-----------------------------------------------|--------|----------------|---------------|----------------|-------------|-------------|
| Species                                       | Donor  | A-FMT          | A-FMT         | A-FMT          | after A-FMT | after A-FMT |
| <i>Rikenella microflusus</i>                  |        |                |               |                |             |             |
| <i>Alistipes putredinis</i>                   | 23983  | 14             | 11153         | 323            | 493         | 119         |
| <i>Alistipes obesi</i>                        |        |                |               |                |             |             |
| <i>Alistipes senegalensis</i>                 |        |                | 107           |                |             | 16          |
| <i>Alistipes timonensis</i>                   |        |                |               |                |             |             |
| <i>Alistipes shahii</i>                       | 3      | 2806           | 304           | 114            | 98          | 57          |
| <i>Alistipes onderdonkii</i>                  | 6263   | 509            | 147           | 192            | 78          | 28          |
| <i>Alistipes finegoldii</i>                   |        | 114            | 187           | 13             | 33          | 15          |
| <i>Candidatus Alistipes marseillanorexici</i> | 650    |                | 151           | 249            | 472         | 103         |
| <i>Alistipes indistinctus</i>                 |        | 1774           |               |                | 4           | 16          |
| <i>Alistipes inops</i>                        |        |                |               |                |             |             |
| <i>Odoribacter splanchnicus</i>               |        | 217            | 26            | 1              | 17          | 4           |
| <i>Butyrivibrio monas virosa</i>              |        |                |               |                |             |             |
| <i>Prevotella dentasini</i>                   |        |                |               |                |             |             |
| <i>Prevotella denticola</i>                   | 1      |                |               |                |             |             |
| <i>Prevotella veroralis</i>                   |        |                |               |                |             |             |
| <i>Prevotella corporis</i>                    |        |                |               |                |             |             |
| <i>Prevotella disiens</i>                     |        |                |               |                |             |             |
| <i>Prevotella nigrescens</i>                  |        |                |               |                |             |             |
| <i>Prevotella bivia</i>                       | 13     | 1              | 1             |                | 4           |             |
| <i>Prevotella buccae</i>                      |        |                |               |                |             |             |
| <i>Prevotella baroniae</i>                    |        |                |               |                |             |             |
| <i>Prevotella multisaccharivorax</i>          |        |                |               |                |             |             |
| <i>Prevotella oris</i>                        |        |                |               |                |             |             |
| <i>Prevotella copri</i>                       | 8179   | 1              | 70307         | 3499           | 41407       | 21253       |
| <i>Prevotella brevis</i>                      |        |                |               |                |             |             |
| <i>Prevotella stercorea</i>                   |        |                | 1805          | 51             | 453         |             |
| <i>Prevotella buccalis</i>                    | 6      |                |               |                |             |             |
| <i>Prevotella timonensis</i>                  |        |                |               |                |             |             |
| <i>Dysgonomonas capnocytophagoides</i>        |        |                |               |                |             |             |
| <i>Bacteroides caecicola</i>                  |        |                |               |                |             |             |
| <i>Bacteroides caecigallinarum</i>            |        |                |               |                |             |             |
| <i>Bacteroides plebeius</i>                   |        | 3537           | 7             | 15             | 2           |             |
| <i>Bacteroides coprocola</i>                  | 23     |                | 5205          | 439            | 1131        | 41          |
| <i>Bacteroides coprophilus</i>                | 1      | 1              | 3191          | 373            | 4509        | 27          |
| <i>Bacteroides massiliensis</i>               | 1      | 4              | 10            | 5              |             | 3           |
| <i>Bacteroides vulgatus</i>                   | 38     | 20151          | 1497          | 1705           | 22          | 39          |
| <i>Bacteroides dorei</i>                      | 7501   | 6183           | 7734          | 20160          | 9929        | 6422        |
| <i>Bacteroides sartorii</i>                   | 1      |                |               |                |             |             |
| <i>Bacteroides fragilis</i>                   | 256    | 2719           | 5             | 4              |             |             |
| <i>Bacteroides thetaiotaomicron</i>           |        | 2209           | 128           | 2783           | 130         | 26          |
| <i>Bacteroides faecis</i>                     |        |                |               |                |             |             |
| <i>Bacteroides caccae</i>                     |        |                | 2419          | 5127           | 1092        | 34          |
| <i>Bacteroides finegoldii</i>                 |        |                |               |                |             |             |
| <i>Bacteroides ovatus</i>                     |        | 4556           | 302           | 651            | 42          | 53          |
| <i>Bacteroides xylanisolvens</i>              |        | 2              | 172           | 306            | 70          | 4           |
| <i>Bacteroides acidifaciens</i>               |        |                |               | 4              |             |             |
| <i>Bacteroides faecichinchillae</i>           |        |                |               |                |             |             |
| <i>Bacteroides salyersiae</i>                 |        |                |               |                |             |             |
| <i>Bacteroides nordii</i>                     |        |                | 3             |                |             |             |
| <i>Bacteroides stercoris</i>                  | 1      | 16262          | 2436          | 2174           | 868         | 513         |
| <i>Bacteroides eggerthii</i>                  | 1      |                | 1             | 2              |             |             |
| <i>Bacteroides clarus</i>                     |        |                | 74            | 223            | 12          | 68          |
| <i>Bacteroides gallinarum</i>                 |        |                |               |                |             |             |
| <i>Bacteroides fluxus</i>                     |        |                |               |                |             |             |
| <i>Bacteroides uniformis</i>                  | 145150 | 59178          | 4856          | 33514          | 629         | 6990        |
| <i>Bacteroides rodentium</i>                  | 14     | 1              | 49            | 322            | 7           | 29          |
| <i>Bacteroides helcogenes</i>                 |        |                |               |                |             |             |
| <i>Bacteroides cellulosilyticus</i>           |        |                |               |                |             |             |
| <i>Candidatus Bacteroides timonensis</i>      |        |                |               |                |             |             |
| <i>Bacteroides intestinalis</i>               |        |                |               | 1              |             | 3           |
| <i>Bacteroides stercorisoris</i>              |        |                |               |                |             |             |
| <i>Bacteroides reticulotermitis</i>           |        |                |               |                |             |             |
| <i>Bacteroides pyogenes</i>                   |        |                |               |                |             |             |
| <i>Parabacteroides johnsonii</i>              | 1      |                | 2             | 21             | 3           |             |
| <i>Parabacteroides merdae</i>                 |        | 13             | 8571          | 168945         | 37494       | 12155       |
| <i>Parabacteroides goldsteinii</i>            |        |                | 7             | 25             |             | 122         |
| <i>Parabacteroides gordonii</i>               |        | 37             | 2             | 24             |             | 39          |
| <i>Parabacteroides faecis</i>                 |        |                |               |                |             |             |
| <i>Parabacteroides distasonis</i>             | 91955  | 153218         | 54292         | 221350         | 48183       | 100426      |
| <i>Paludibacter propionigenes</i>             |        |                |               |                |             |             |
| <i>Copro bacter fastidiosus</i>               |        |                |               |                |             |             |
| <i>Copro bacter secundus</i>                  |        |                |               |                |             |             |
| <i>Barnesiella intestinihominis</i>           |        |                | 2             |                |             |             |
| <i>Paraprevotella xylaniphila</i>             |        | 2327           | 946           | 547            | 201         | 115         |
| <i>Paraprevotella clara</i>                   |        | 503            | 165           | 113            | 40          | 18          |
| <i>Porphyromonas pasteri</i>                  |        |                |               |                |             |             |
| <i>Porphyromonas somerae</i>                  |        |                |               |                |             |             |
| <i>Porphyromonas uenonis</i>                  |        |                |               |                |             |             |
| <i>Porphyromonas asaccharolytica</i>          |        |                |               |                |             |             |
| Total Reads                                   | 284041 | 276337         | 176264        | 463275         | 147423      | 148738      |

| Morisita's C λ        | λ           | C λ   | Patient before | 2 weeks after | 2 months    | 12 months   | 24 months after |
|-----------------------|-------------|-------|----------------|---------------|-------------|-------------|-----------------|
| Donor                 | 0.375091651 | Donor | A-FMT          | A-FMT         | after A-FMT | after A-FMT | A-FMT           |
| Patient before A-FMT  | 0.363385715 |       | 0.784290312    | 0.411951      | 0.51921856  | 0.374419063 | 0.575138407     |
| 2 weeks after A-FMT   | 0.264817794 |       |                | 0.5705312     | 0.77052872  | 0.594208659 | 0.906916112     |
| 2 months after A-FMT  | 0.368659148 |       |                |               | 0.54356165  | 0.880678672 | 0.724181991     |
| 12 months after A-FMT | 0.256061482 |       |                |               |             | 0.814517404 | 0.838557349     |
| 24 months after A-FMT | 0.487057891 |       |                |               |             |             | 0.766329631     |

| Kimoto's C π          | π           | C π   | Patient before | 2 weeks after | 2 months    | 12 months   | 24 months after |
|-----------------------|-------------|-------|----------------|---------------|-------------|-------------|-----------------|
| Donor                 | 0.375093851 | Donor | A-FMT          | A-FMT         | after A-FMT | after A-FMT | A-FMT           |
| Patient before A-FMT  | 0.363388019 |       | 0.784285529    | 0.411946898   | 0.51921608  | 0.374414764 | 0.575134639     |
| 2 weeks after A-FMT   | 0.264821965 |       |                | 0.57052532    | 0.77052486  | 0.594201609 | 0.906909977     |
| 2 months after A-FMT  | 0.368660511 |       |                |               | 0.5435569   | 0.880663088 | 0.724174652     |
| 12 months after A-FMT | 0.256066529 |       |                |               |             | 0.814509048 | 0.838552635     |
| 24 months after A-FMT | 0.48706134  |       |                |               |             |             | 0.766320871     |

| Horn's R0             | Patient before | 2 weeks after | 2 months    | 12 months   | 24 months   |
|-----------------------|----------------|---------------|-------------|-------------|-------------|
| Donor                 | A-FMT          | A-FMT         | after A-FMT | after A-FMT | after A-FMT |
| Patient before A-FMT  | 0.76659419     | 0.581625775   | 0.609855017 | 0.476998053 | 0.681942243 |
| 2 weeks after A-FMT   |                | 0.544151703   | 0.715057459 | 0.479470715 | 0.747326385 |
| 2 months after A-FMT  |                |               | 0.622969279 | 0.888686959 | 0.829261589 |
| 12 months after A-FMT |                |               |             | 0.796850016 | 0.85873781  |
|                       |                |               |             |             | 0.863186071 |

| #6                                          | Read   |        | Patient before | 3 weeks after | 2 months    | 7 months after | 24 months   |
|---------------------------------------------|--------|--------|----------------|---------------|-------------|----------------|-------------|
| Species                                     | Donor  | A-FMT  | A-FMT          | after A-FMT   | after A-FMT | after A-FMT    | after A-FMT |
| <i>Rikenella microflus</i>                  |        |        |                |               |             |                |             |
| <i>Alistipes putredinis</i>                 | 45756  |        |                | 14619         | 240         | 542            | 3           |
| <i>Alistipes obesi</i>                      | 1      |        |                |               |             |                |             |
| <i>Alistipes senegalensis</i>               | 844    |        |                | 75            | 3           |                |             |
| <i>Alistipes timonensis</i>                 | 1      |        |                |               |             |                |             |
| <i>Alistipes shahii</i>                     | 1186   |        | 2              | 109           | 5           | 1              | 1           |
| <i>Alistipes onderdonkii</i>                | 12632  | 468    |                | 338           | 178         | 201            | 47          |
| <i>Alistipes finegoldii</i>                 | 2199   |        |                | 25            |             |                |             |
| <i>Candidatus Alistipes marseillanorexi</i> | 235    |        |                | 232           |             | 1              |             |
| <i>Alistipes indistinctus</i>               | 37     |        |                | 245           | 2           | 16             |             |
| <i>Alistipes inops</i>                      |        |        |                |               |             |                |             |
| <i>Odoribacter splanchnicus</i>             | 52     |        |                | 1             | 2           |                |             |
| <i>Butyricimonas virosa</i>                 |        |        |                |               |             |                |             |
| <i>Prevotella dantisini</i>                 |        |        |                |               |             |                |             |
| <i>Prevotella denticola</i>                 |        |        |                |               |             |                |             |
| <i>Prevotella veroralis</i>                 |        |        |                |               |             |                |             |
| <i>Prevotella corporis</i>                  |        |        |                |               |             |                |             |
| <i>Prevotella disiens</i>                   | 1      |        |                | 1             | 1           | 1              |             |
| <i>Prevotella nigrescens</i>                |        |        |                |               |             |                |             |
| <i>Prevotella bivia</i>                     |        | 13     |                | 27            |             | 2              |             |
| <i>Prevotella buccae</i>                    |        |        |                |               |             |                |             |
| <i>Prevotella baroniae</i>                  |        |        |                |               |             |                |             |
| <i>Prevotella multisaccharivorax</i>        |        |        |                |               |             |                |             |
| <i>Prevotella oris</i>                      |        |        |                |               |             |                |             |
| <i>Prevotella copri</i>                     | 1      | 1      |                | 52            | 7230        | 61             | 9           |
| <i>Prevotella brevis</i>                    |        |        |                |               |             |                |             |
| <i>Prevotella stercorea</i>                 |        |        |                |               |             |                |             |
| <i>Prevotella buccalis</i>                  | 1      |        |                |               |             |                |             |
| <i>Prevotella timonensis</i>                | 1      |        |                |               |             |                |             |
| <i>Dysgonomonas capnocytophagoides</i>      |        |        |                |               |             |                |             |
| <i>Bacteroides caecicola</i>                |        |        |                |               |             |                |             |
| <i>Bacteroides caecigallinarum</i>          |        |        |                |               |             |                |             |
| <i>Bacteroides plebeius</i>                 | 1559   |        |                | 42737         | 44963       | 23587          | 30          |
| <i>Bacteroides coprocola</i>                | 4489   |        |                | 7528          | 13409       | 5374           | 4           |
| <i>Bacteroides coprophilus</i>              |        |        |                | 1             |             | 1              | 1           |
| <i>Bacteroides massiliensis</i>             | 4241   | 22     |                | 1404          | 2030        | 2209           | 6           |
| <i>Bacteroides vulgatus</i>                 | 25749  | 56171  |                | 8150          | 6827        | 11363          | 20          |
| <i>Bacteroides dorei</i>                    | 4505   | 16     |                | 4064          | 1066        | 4889           | 7           |
| <i>Bacteroides sartorii</i>                 |        |        |                |               |             |                |             |
| <i>Bacteroides fragilis</i>                 |        |        |                | 8             | 1           | 24             |             |
| <i>Bacteroides thetaiotaomicron</i>         | 6435   | 296    |                | 2510          | 1270        | 7132           | 8           |
| <i>Bacteroides faecis</i>                   | 1      |        |                |               |             |                |             |
| <i>Bacteroides caccae</i>                   | 669    | 2235   |                | 4799          | 1895        | 11940          | 8           |
| <i>Bacteroides finegoldii</i>               | 1      |        |                |               |             | 4              |             |
| <i>Bacteroides ovatus</i>                   | 1145   | 157    |                | 339           | 188         | 2946           |             |
| <i>Bacteroides xylanisolvens</i>            | 1      | 4723   |                |               | 5           | 4              |             |
| <i>Bacteroides acidifaciens</i>             | 1      | 1      |                |               |             | 11             |             |
| <i>Bacteroides faecichinchillae</i>         |        |        |                |               |             |                |             |
| <i>Bacteroides salyersiae</i>               |        |        |                |               | 1           |                |             |
| <i>Bacteroides nordii</i>                   | 14     |        |                | 10            | 1           |                |             |
| <i>Bacteroides stercoris</i>                | 14950  | 2      |                | 615           | 2496        | 3398           | 3           |
| <i>Bacteroides eggerthii</i>                | 5      |        |                |               | 3           | 2              |             |
| <i>Bacteroides clarus</i>                   | 4      | 1      |                |               | 2           | 1              | 2           |
| <i>Bacteroides gallinarum</i>               |        |        |                |               |             |                |             |
| <i>Bacteroides fluxus</i>                   |        |        |                |               |             |                |             |
| <i>Bacteroides uniformis</i>                | 20241  | 115725 |                | 6966          | 1946        | 18455          | 15          |
| <i>Bacteroides rodentium</i>                | 4012   | 9      |                | 1077          | 272         | 1490           | 1           |
| <i>Bacteroides helcogenes</i>               | 5      |        |                | 1             |             | 3              |             |
| <i>Bacteroides cellulosilyticus</i>         |        |        |                |               |             |                |             |
| <i>Candidatus Bacteroides timonensis</i>    |        |        |                |               |             |                |             |
| <i>Bacteroides intestinalis</i>             |        |        |                | 1             |             | 1              |             |
| <i>Bacteroides stercorisoris</i>            | 1      |        |                |               |             |                |             |
| <i>Bacteroides reticulotermitis</i>         |        |        |                |               |             |                |             |
| <i>Bacteroides pyogenes</i>                 |        |        |                |               |             | 1              |             |
| <i>Parabacteroides johnsonii</i>            | 3      | 1      |                | 4             | 3           | 7              | 1           |
| <i>Parabacteroides merdae</i>               | 21462  | 1      |                | 12751         | 5860        | 16131          | 318         |
| <i>Parabacteroides goldsteinii</i>          | 381    |        |                |               |             |                |             |
| <i>Parabacteroides gordonii</i>             | 23     |        |                |               |             |                |             |
| <i>Parabacteroides faecis</i>               |        | 1      |                |               |             |                |             |
| <i>Parabacteroides distasonis</i>           | 123640 | 64144  |                | 23190         | 17470       | 28108          | 30          |
| <i>Paludibacter propionigenes</i>           |        |        |                |               |             |                |             |
| <i>Copro bacter fastidiosus</i>             | 224    |        |                | 1             | 1           | 1              |             |
| <i>Copro bacter secundus</i>                | 15     |        |                | 1             |             |                |             |
| <i>Barnesiella intestinihominis</i>         | 1135   |        |                | 40            | 6           |                |             |
| <i>Paraprevotella xylaniphila</i>           | 10576  |        |                | 1277          | 173         | 6664           | 1           |
| <i>Paraprevotella clara</i>                 | 13     |        |                | 1             |             | 12             |             |
| <i>Porphyromonas pasteri</i>                |        |        |                |               |             |                |             |
| <i>Porphyromonas somerae</i>                |        |        |                |               |             |                |             |
| <i>Porphyromonas uenonis</i>                | 2      | 1      |                | 3             | 8           | 41             | 1           |
| <i>Porphyromonas asaccharolytica</i>        |        | 2      |                |               | 1           | 3              |             |
| Total Reads                                 | 308449 | 243992 | 133202         | 107558        | 144627      | 516            |             |

| Morisita's C λ        |             | C λ                  |                     |                      |                      |                       |  |
|-----------------------|-------------|----------------------|---------------------|----------------------|----------------------|-----------------------|--|
|                       | λ           | Patient before A-FMT | 3 weeks after A-FMT | 2 months after A-FMT | 7 months after A-FMT | 24 months after A-FMT |  |
| Donor                 | 0.205349256 | Donor 0.563778491    | 0.566922053         | 0.374977018          | 0.671706784          | 0.256944921           |  |
| Patient before A-FMT  | 0.347533281 | Patient before A-FMT | 0.330469405         | 0.22883847           | 0.565097356          | 0.102936702           |  |
| 3 weeks after A-FMT   | 0.16701961  | 3 weeks after A-FMT  |                     | 0.913229231          | 0.82854126           | 0.334650535           |  |
| 2 months after A-FMT  | 0.229975073 | 2 months after A-FMT |                     |                      | 0.703313114          | 0.234555235           |  |
| 7 months after A-FMT  | 0.114475386 | 7 months after A-FMT |                     |                      |                      | 0.389399776           |  |
| 24 months after A-FMT | 0.397305637 |                      |                     |                      |                      |                       |  |

| Kimoto's C $\pi$      |             | C $\pi$ |                       | Patient before | 3 weeks after | 2 months after | 7 months after | 24 months after |
|-----------------------|-------------|---------|-----------------------|----------------|---------------|----------------|----------------|-----------------|
|                       | II          |         | Donor                 | A-FMT          | A-FMT         | A-FMT          | A-FMT          | A-FMT           |
| Donor                 | 0.205351832 |         | Donor                 | 0.563773137    | 0.56690861    | 0.374968632    | 0.671688515    | 0.256446802     |
| Patient before A-FMT  | 0.347535955 |         | Patient before A-FMT  |                | 0.330463671   | 0.228834573    | 0.565086596    | 0.102775167     |
| 3 weeks after A-FMT   | 0.167025863 |         | 3 weeks after A-FMT   |                |               | 0.913198378    | 0.828504833    | 0.33395563      |
| 2 months after A-FMT  | 0.229982233 |         | 2 months after A-FMT  |                |               |                | 0.703285995    | 0.234116632     |
| 7 months after A-FMT  | 0.114481509 |         | 7 months after A-FMT  |                |               |                |                | 0.388508455     |
| 24 months after A-FMT | 0.398473649 |         | 24 months after A-FMT |                |               |                |                |                 |

| Horn's R0            |             | Patient before | 3 weeks after | 2 months    | 7 months    | 24 months after |
|----------------------|-------------|----------------|---------------|-------------|-------------|-----------------|
| Donor                | A-FMT       | A-FMT          | after A-FMT   | after A-FMT | A-FMT       | A-FMT           |
| Patient before A-FMT | 0.618290151 | 0.733869472    | 0.55115525    | 0.751942197 | 0.791189686 |                 |
| 3 weeks after A-FMT  |             | 0.442071825    | 0.36244284    | 0.584259117 | 0.240194546 |                 |
| 2 months after A-FMT |             |                | 0.87731559    | 0.885695275 | 0.798775573 |                 |
| 7 months after A-FMT |             |                |               | 0.808936971 | 0.73816574  |                 |
|                      |             |                |               |             | 0.811704251 |                 |

[illegible]

[illegible]

| #29<br>READ                                     |        |                        |                          |                          |
|-------------------------------------------------|--------|------------------------|--------------------------|--------------------------|
| Species                                         | Donor  | 1 month after<br>A-FMT | 12 months<br>after A-FMT | 24 months after<br>A-FMT |
| <i>Capnocytophaga sputigena</i>                 |        |                        |                          |                          |
| <i>Alistipes putredinis</i>                     | 14952  | 8303                   | 836                      | 593                      |
| <i>Alistipes obesi</i>                          | 19     | 2                      | 4                        |                          |
| <i>Alistipes senegalensis</i>                   |        |                        |                          |                          |
| <i>Alistipes timonensis</i>                     |        |                        |                          |                          |
| <i>Alistipes shahii</i>                         | 1172   | 154                    | 99                       | 26                       |
| <i>Alistipes onderdonkii</i>                    | 744    | 281                    | 145                      | 305                      |
| <i>Alistipes finegoldii</i>                     |        | 161                    |                          |                          |
| <i>Candidatus Alistipes marseilloanorexicus</i> | 60     | 233                    | 1                        |                          |
| <i>Alistipes indistinctus</i>                   |        | 96                     |                          |                          |
| <i>Odoribacter splanchnicus</i>                 | 45     | 31                     | 46                       |                          |
| <i>Sanguibacteroides justesenii</i>             | 1      |                        |                          |                          |
| <i>Butyricimonas virosa</i>                     | 1      |                        |                          |                          |
| <i>Prevotella denticola</i>                     | 40     |                        |                          |                          |
| <i>Prevotella veroralis</i>                     |        |                        |                          |                          |
| <i>Prevotella melaninogenica</i>                |        |                        |                          |                          |
| <i>Prevotella corporis</i>                      |        | 21                     |                          |                          |
| <i>Prevotella disiens</i>                       |        |                        |                          | 1                        |
| <i>Prevotella bivia</i>                         |        | 12                     |                          |                          |
| <i>Prevotella oris</i>                          |        |                        |                          |                          |
| <i>Prevotella copri</i>                         | 4505   |                        | 779                      | 121                      |
| <i>Prevotella stercorea</i>                     | 1      |                        | 12                       | 3                        |
| <i>Prevotella buccalis</i>                      | 25     |                        |                          | 13                       |
| <i>Dysgonomonas capnocytophagoides</i>          |        |                        |                          |                          |
| <i>Bacteroides plebeius</i>                     | 396    |                        | 302                      | 297                      |
| <i>Bacteroides coprocola</i>                    |        |                        |                          |                          |
| <i>Bacteroides massiliensis</i>                 | 14     |                        | 1                        | 30                       |
| <i>Bacteroides vulgatus</i>                     | 1204   |                        | 119                      | 2497                     |
| <i>Bacteroides dorei</i>                        | 624    | 7116                   | 5                        | 476                      |
| <i>Bacteroides fragilis</i>                     | 4      | 98                     |                          | 1                        |
| <i>Bacteroides thetaiotaomicron</i>             | 544    | 494                    | 284                      | 108                      |
| <i>Bacteroides faecis</i>                       |        |                        |                          |                          |
| <i>Bacteroides caccae</i>                       | 175    | 3068                   | 227                      | 108                      |
| <i>Bacteroides finegoldii</i>                   | 357    |                        | 36                       | 1                        |
| <i>Bacteroides ovatus</i>                       | 131    | 18                     | 57                       |                          |
| <i>Bacteroides xylanisolvens</i>                | 285    | 2060                   | 415                      | 29                       |
| <i>Bacteroides acidifaciens</i>                 |        |                        |                          |                          |
| <i>Bacteroides salyersiae</i>                   |        |                        |                          |                          |
| <i>Bacteroides stercoris</i>                    | 8252   |                        | 213                      | 1330                     |
| <i>Bacteroides eggerthii</i>                    | 28     |                        | 11                       | 3                        |
| <i>Bacteroides clarus</i>                       |        | 2044                   | 1                        |                          |
| <i>Bacteroides gallinarum</i>                   |        |                        |                          | 1                        |
| <i>Bacteroides uniformis</i>                    | 21397  | 51859                  | 994                      | 2354                     |
| <i>Bacteroides rodentium</i>                    | 2      | 2                      |                          |                          |
| <i>Bacteroides helcogenes</i>                   |        |                        |                          | 1                        |
| <i>Bacteroides cellulosilyticus</i>             | 1874   |                        |                          |                          |
| <i>Candidatus Bacteroides timonensis</i>        | 9      |                        |                          |                          |
| <i>Bacteroides intestinalis</i>                 | 4677   | 1                      |                          |                          |
| <i>Parabacteroides johnsonii</i>                | 39     |                        | 1                        | 29                       |
| <i>Parabacteroides merdae</i>                   | 87381  | 15051                  | 7167                     | 101241                   |
| <i>Parabacteroides goldsteinii</i>              |        |                        |                          | 1                        |
| <i>Parabacteroides gordonii</i>                 |        |                        |                          |                          |
| <i>Parabacteroides faecis</i>                   |        |                        |                          |                          |
| <i>Parabacteroides distasonis</i>               | 14804  | 16868                  | 2909                     | 28514                    |
| <i>Coprobacter fastidiosus</i>                  | 29     | 39                     |                          |                          |
| <i>Coprobacter secundus</i>                     | 9      |                        |                          |                          |
| <i>Barnesiella intestinihominis</i>             | 37     | 792                    |                          |                          |
| <i>Marinifilum fragile</i>                      |        |                        |                          |                          |
| <i>Paraprevotella xylaniphila</i>               | 4044   |                        | 1                        | 42                       |
| <i>Paraprevotella clara</i>                     | 1277   |                        |                          | 13                       |
| <i>Porphyromonas pasteri</i>                    |        |                        |                          |                          |
| <i>Porphyromonas uenonis</i>                    | 366    | 177                    |                          | 470                      |
| <i>Porphyromonas asaccharolytica</i>            | 2      |                        |                          | 624                      |
| Total Reads                                     | 169526 | 108981                 | 14665                    | 139232                   |

| Morisita's C $\lambda$ |             |  |                       | 1 month after<br>A-FMT | 12 months<br>after A-FMT | 24 months<br>after A-FMT |
|------------------------|-------------|--|-----------------------|------------------------|--------------------------|--------------------------|
|                        | $\lambda$   |  | C $\lambda$           |                        |                          |                          |
| Donor                  | 0.301758495 |  | Donor                 | 0.520949197            | 0.962328174              | 0.906677849              |
| 1 month after A-FMT    | 0.281123056 |  | 1 month after A-FMT   |                        | 0.475034645              | 0.330190996              |
| 12 months after A-FMT  | 0.29109942  |  | 12 months after A-FMT |                        |                          | 0.922409451              |
| 24 months after A-FMT  | 0.57144043  |  |                       |                        |                          |                          |

| Kimoto's C $\pi$      |             |  |                       | 1 month after<br>A-FMT | 12 months<br>after A-FMT | 24 months<br>after A-FMT |
|-----------------------|-------------|--|-----------------------|------------------------|--------------------------|--------------------------|
|                       | $\Pi$       |  | C $\Pi$               |                        |                          |                          |
| Donor                 | 0.301762614 |  | Donor                 | 0.52093962             | 0.962243031              | 0.906670376              |
| 1 month after A-FMT   | 0.281129653 |  | 1 month after A-FMT   |                        | 0.474989044              | 0.330187249              |
| 12 months after A-FMT | 0.29114776  |  | 12 months after A-FMT |                        |                          | 0.922354468              |
| 24 months after A-FMT | 0.571443508 |  |                       |                        |                          |                          |

| Horn's R0             |             | 1 month after<br>A-FMT | 12 months<br>after A-FMT | 24 months<br>after A-FMT |
|-----------------------|-------------|------------------------|--------------------------|--------------------------|
|                       |             |                        |                          |                          |
| Donor                 | 0.699442625 | 0.920739667            | 0.84023972               |                          |
| 1 month after A-FMT   |             | 0.733215561            | 0.529776447              |                          |
| 12 months after A-FMT |             |                        | 0.86583328               |                          |
